# Supplementary material
Source: publisher site journal article supplement (https://www.dovepress.com/get_supplementary_file.php?f=297838.docx)
Supplement: Supplementary file 1 [file get_supplementary_file.php]

**Supplementary material 1**

**###code**

library(caret)

library(C50)

# LOAD THE DATA INTO THE SESSION

# (THE DATA ARE STORED IN A .CSV FILE)

nursing <-read.csv("C:/Users/hey/Desktop/nursing.csv",fileEncoding="UTF-8-BOM")

##########################

# type of variable

##########################

fac_list <- c(

'group',

'diarrhea',

'Bed_rest',

'Restraint_zone',

'surgery',

'Have_you_accepted_passive_turning_over',

'diabetes',

'fracture'

)

range_list <- c(

'age',

'body_weight',

'pressure_ulcer_evaluation_total_score',

'pressure_ulcer_assessment_incontinence_score',

'pressure_ulcer_evaluation_activity_score',

'pressure_ulcer_evaluation_mental_score',

'NRS2002_Nutritional_Risk_Assessment_Total_Score',

'Total_intake',

'Total_output',

'body_temperature',

'Systolic_blood_pressure',

'blood_sugar'

)

fac_data <- nursing[,fac_list]

range_data <- nursing[,range_list]

for (i in 1:length(fac_data)){

fac_data[,i] <- as.factor(fac_data[,i])

}

data <- cbind(fac_data,range_data)

##########################

# Split data

##########################

set.seed(71)

sub<-sample(1:nrow(data),round(nrow(data)*1/2))

trainingSet <- data[sub,]

testSet <- data[-sub,]

##########################

# Model

##########################

# Model 1 :C5.0

folds <- createFolds(y=trainingSet$group,k=10)

max=0

num=0

for(i in 1:10){

fold_test <- trainingSet[folds[[i]],] #test

fold_train <- trainingSet[-folds[[i]],] # train

print("***NO.***")

# fold_pre <- glm(group ~.,family=binomial(link='logit'),data=fold_train)

fold_pre = C5.0(group~.,

data=fold_train,

minCases = i,

trials=1)

pre.test_tree <- predict(fold_pre,newdata = fold_test,type = "class")

print(i)

Confusion <- table(fold_test$group, pre.test_tree)

tp <- Confusion[4]

tn <- Confusion[1]

fp <- Confusion[2]

fn <- Confusion[3]

a <- prop.table(Confusion,1)

b <- prop.table(Confusion,2)

precision_test.rf <- b[4]

recall_test.rf <- a[4]

accuracy_test.rf <- (Confusion[1]+Confusion[4])/margin.table(Confusion)

F_measure_test.rf <-2*precision_test.rf*recall_test.rf/(precision_test.rf+recall_test.rf)

print("***accuracy***")

print(accuracy_test.rf)

print("***F1***")

print(F_measure_test.rf)

}

# Model 2 :rf

fitControl = trainControl(method = "cv", number = 10)

gbmGrid_rf = expand.grid(.mtry = c(2, 4, 8, 10))

m_rf = train(group ~ ., data = trainingSet,

method = "rf",

trControl = fitControl,

tuneGrid = gbmGrid_rf)

# Model 3 :MLP

gbmGrid_rf = expand.grid(.size = c(2, 4, 8, 10, 12, 14))

m_mlp = train(group ~ ., data = trainingSet,

method = "mlp",

trControl = fitControl)

# Model 4 :SVM

gbmGrid_svm = expand.grid(.sigma=c(0.01,0.02,0.03,0.04,0.05),.C=1)

m_svm = train(group ~ ., data = trainingSet,

method = "svmRadial",

trControl = fitControl,

tuneGrid = gbmGrid_svm)

##########################

# Test

##########################

# Model 1 :C5.0

pre.test_tree <- predict(m_C50,newdata = testSet,type = "class")

table(testSet$group, pre.test_tree)

# Model 2 :rf

pre.test_rf <- predict(m_rf,newdata = testSet,type = "raw")

table(testSet$group, pre.test_rf)

# Model 3 :MLP

pre.test_mlp <- predict(m_mlp,newdata = testSet,type = "raw")

table(testSet$group, pre.test_mlp)

# Model 4 :SVM

pre.test_svm <- predict(m_svm,newdata = testSet,type = "raw")

table(testSet$group, pre.test_svm)
